# Supplementary material for: Modulation of Plasma and Milk Sphingolipids in Dairy Cows Fed High-Starch Diets
Source: MDPI journal article supplement (doi:10.3390/metabo11100711), 2021-10-19
Supplement: s1 [file s1]

## Supplementary Materials

**Table S1.** Sphingolipid concentrations in plasma following 3 weeks of high-starch (HS) feeding or Control. Sphingosine (Sph), dihydro ceramide (dhCer), ceramide (Cer), galactosyl  $\beta$ -ceramide (Gal( $\beta$ )Cer), lactosyl  $\beta$ -ceramide (Lac( $\beta$ )Cer), and sphingomyelin (SM). Data are presented as least square means and standard error of blood collected from multiparous Holstein dairy cows (n = 12) at day 21 d. Lipidomics data were obtained using UPLC-MRM/MS with a UHPLC system and QTRAP mass spectrometry.

| Concentration, nmol/mL        | SARA   | Control | SEM    | P-value |
|-------------------------------|--------|---------|--------|---------|
| SPH(d16:0)                    | 0.0024 | 0.0037  | 0.0006 | 0.30    |
| SPH (d18:0)                   | 0.0031 | 0.0023  | 0.0004 | 0.33    |
| SPH(d20:0)                    | 0.0023 | 0.0020  | 0.0002 | -       |
| dhCer(d18:0/22:0)             | 0.0173 | 0.0220  | 0.0023 | 0.16    |
| dhCer(d18:0/24:0)             | 0.0630 | 0.0668  | 0.0054 | 0.63    |
| Cer(d18:1/14:0)               | 0.0123 | 0.0193  | 0.0014 | 0.05    |
| Cer(d18:1/16:0)               | 0.1405 | 0.1726  | 0.0214 | 0.31    |
| Cer (d18:1/18:0)              | 0.0072 | 0.0067  | 0.0009 | 0.79    |
| Cer(d18:1/22:0)               | 0.0114 | 0.0104  | 0.0019 | 0.69    |
| Cer(d18:1/23:0)               | 0.0216 | 0.0214  | 0.0035 | 0.94    |
| Cer(d18:1/24:0)               | 0.0335 | 0.0454  | 0.0061 | 0.05    |
| Cer(d18:1/24:1(15Z))          | 0.0201 | 0.0214  | 0.0021 | 0.48    |
| SM(d18:1/12:0)                | 0.3797 | 0.3745  | 0.0474 | 0.87    |
| SM(d18:1/14:0)                | 4.40   | 4.49    | 0.3986 | 0.83    |
| SM(d18:1/16:0)                | 31.6   | 33.7    | 2.1454 | 0.35    |
| SM(d18:1/16:1)                | 6.33   | 6.51    | 0.3401 | 0.75    |
| SM(d18:1/17:0)                | 32.6   | 31.6    | 1.3071 | 0.50    |
| SM(d18:1/18:0)                | 3.33   | 3.39    | 0.1830 | 0.66    |
| SM(d18:1/18:1)                | 5.88   | 6.21    | 0.4695 | 0.13    |
| SM(d18:1/18:2)                | 0.87   | 1.06    | 0.0959 | 0.00    |
| SM(d18:1/19:0)                | 1.47   | 1.72    | 0.1251 | 0.02    |
| SM(d18:1/20:0)                | 0.72   | 0.73    | 0.0753 | 0.88    |
| SM(d18:1/20:1)                | 0.78   | 0.85    | 0.0489 | 0.11    |
| SM(d18:1/20:4)                | 0.08   | 0.10    | 0.0069 | 0.11    |
| SM(d18:1/22:0)                | 4.41   | 4.68    | 0.3606 | 0.43    |
| SM(d18:1/23:0)                | 25.1   | 28.7    | 2.2655 | 0.18    |
| SM(d18:1/24:0)                | 17.8   | 18.9    | 1.1853 | 0.41    |
| SM(d18:1/24:1)                | 9.40   | 10.96   | 0.6981 | 0.10    |
| SM(d18:1/26:0)                | 0.73   | 0.79    | 0.0935 | 0.24    |
| Glc( $\beta$ )Cer(d18:1/18:0) | 0.0020 | 0.0024  | 0.0004 | 0.36    |
| Gal( $\beta$ )Cer(d18:1/22:0) | 0.0644 | 0.0696  | 0.0097 | 0.59    |
| Gal( $\beta$ )Cer(d18:1/23:0) | 0.0727 | 0.0768  | 0.0125 | 0.66    |
| Gal( $\beta$ )Cer(d18:1/24:0) | 0.1193 | 0.1515  | 0.0185 | 0.31    |
| Lac( $\beta$ )Cer(d18:1/14:0) | 0.0922 | 0.0692  | 0.0108 | 0.20    |
| Lac( $\beta$ )Cer(d18:1/16:0) | 0.1388 | 0.1489  | 0.0080 | 0.35    |

|                               |        |        |        |      |
|-------------------------------|--------|--------|--------|------|
| Lac( $\beta$ )Cer(d18:1/17:0) | 0.0178 | 0.0137 | 0.0037 | 0.14 |
| Lac( $\beta$ )Cer(d18:1/18:0) | 0.0141 | 0.0192 | 0.0027 | 0.20 |
| Lac( $\beta$ )Cer(d18:1/18:1) | 0.0113 | 0.0149 | 0.0030 | 0.48 |
| Lac( $\beta$ )Cer(d18:1/22:0) | 0.0041 | 0.0040 | 0.0006 | 0.75 |
| Lac( $\beta$ )Cer(d18:1/23:0) | 0.0057 | 0.0075 | 0.0008 | -    |
| Lac( $\beta$ )Cer(d18:1/24:0) | 0.0359 | 0.0343 | 0.0080 | 0.87 |
| Lac( $\beta$ )Cer(d18:1/24:1) | 0.0392 | 0.0534 | 0.0107 | 0.17 |

**Table S2.** Sphingolipid concentrations in milk fat following 3 weeks of high-starch (HS) feeding or Control. Sphingosine (Sph), dihydro ceramide (dhCer), ceramide (Cer), galactosyl  $\beta$ -ceramide (Gal( $\beta$ )Cer), lactosyl  $\beta$ -ceramide (Lac( $\beta$ )Cer), and sphingomyelin (SM). Data are presented as least square means and standard error of milk collected from multiparous Holstein dairy cows (n = 12) at day 21 d. Lipidomics data were obtained using UPLC-MRM/MS with a UHPLC system and QTRAP mass spectrometry.

| Concentration, nmol/g | SARA  | Control | SEM  | P-value |
|-----------------------|-------|---------|------|---------|
| dhCer(d18:0/12:0)     | 0.53  | 0.60    | 0.09 | 0.372   |
| dhCer(d18:0/14:0)     | 0.50  | 0.56    | 0.05 | 0.068   |
| dhCer(d18:0/16:0)     | 0.57  | 0.63    | 0.04 | 0.064   |
| dhCer(d18:0/17:0)     | 0.24  | 0.26    | 0.02 | 0.697   |
| dhCer(d18:0/20:0)     | 2.55  | 2.70    | 0.29 | 0.437   |
| dhCer(d18:0/22:0)     | 2.25  | 2.77    | 0.22 | 0.007   |
| dhCer(d18:0/24:0)     | 0.57  | 0.68    | 0.05 | 0.026   |
| Cer (d18:1/12:0)      | 0.02  | 0.02    | 0.00 | 0.793   |
| Cer(d18:1/14:0)       | 0.38  | 0.44    | 0.04 | 0.219   |
| Cer(d18:1/16:0)       | 21.60 | 23.97   | 1.86 | 0.057   |
| Cer(d18:1/17:0)       | 0.12  | 0.14    | 0.01 | 0.092   |
| Cer (d18:1/18:0)      | 1.67  | 1.83    | 0.14 | 0.146   |
| Cer(d18:1/19:0)       | 0.30  | 0.28    | 0.02 | 0.662   |
| Cer(d18:1/20:0)       | 0.12  | 0.12    | 0.01 | 0.541   |
| Cer(d18:1/21:0)       | 0.23  | 0.25    | 0.02 | 0.237   |
| Cer(d18:1/22:0)       | 2.70  | 3.29    | 0.13 | 0.001   |
| Cer(d18:1/23:0)       | 5.51  | 7.47    | 0.52 | 0.001   |
| Cer(d18:1/24:0)       | 3.59  | 4.71    | 0.19 | 0.003   |
| Cer(d18:1/24:1(15Z))  | 1.04  | 1.40    | 0.10 | <0.0001 |
| Cer(d18:1/26:0)       | 0.03  | 0.04    | 0.00 | 0.428   |
| SM(d18:1/12:0)        | 1.00  | 1.18    | 0.10 | 0.163   |
| SM(d18:1/14:0)        | 17.0  | 21.0    | 1.79 | 0.047   |
| SM(d18:1/16:0)        | 61.2  | 79.5    | 5.19 | 0.002   |
| SM(d18:1/16:1)        | 2.63  | 3.25    | 0.37 | 0.159   |
| SM(d18:1/17:0)        | 32.1  | 40.9    | 1.57 | 0.001   |
| SM(d18:1/18:0)        | 6.16  | 6.30    | 0.20 | 0.473   |
| SM(d18:1/18:1)        | 1.70  | 1.88    | 0.09 | 0.024   |

|                                    |       |       |      |         |
|------------------------------------|-------|-------|------|---------|
| SM(d18:1/18:2)                     | 0.16  | 0.20  | 0.01 | 0.008   |
| SM(d18:1/19:0)                     | 1.88  | 2.01  | 0.11 | 0.221   |
| SM(d18:1/20:0)                     | 11.63 | 13.03 | 0.91 | 0.039   |
| SM(d18:1/20:1)                     | 0.68  | 0.69  | 0.04 | 0.824   |
| SM(d18:1/20:4)                     | 0.25  | 0.40  | 0.04 | 0.004   |
| SM(d18:1/22:0)                     | 26.8  | 33.4  | 1.31 | 0.0001  |
| SM(d18:1/23:0)                     | 83.2  | 123.0 | 6.27 | <0.0001 |
| SM(d18:1/24:0)                     | 38.1  | 52.7  | 2.73 | <0.0001 |
| SM(d18:1/24:1)                     | 9.34  | 14.12 | 0.66 | <0.0001 |
| SM(d18:1/26:0)                     | 0.71  | 1.02  | 0.05 | 0.000   |
| Gal( $\beta$ )Cer(d18:1/12:0)      | 0.03  | 0.04  | 0.00 | 0.265   |
| Gal( $\beta$ )Cer(d18:1/14:0)      | 0.40  | 0.50  | 0.05 | 0.097   |
| Gal( $\beta$ )Cer(d18:1/16:0)      | 8.8   | 12.0  | 0.92 | 0.004   |
| Glc( $\beta$ )Cer(d18:1/18:0)      | 0.53  | 0.57  | 0.05 | 0.337   |
| Glc( $\beta$ )Cer(d18:1/18:1(9Z))  | 0.24  | 0.24  | 0.03 | 0.810   |
| Glc( $\beta$ )Cer(d18:1/19:0)      | 0.05  | 0.05  | 0.01 | 0.889   |
| Glc( $\beta$ )Cer(d18:1/20:0)      | 0.28  | 0.29  | 0.03 | 0.711   |
| Glc( $\beta$ )Cer(d18:1/21:0)      | 0.31  | 0.36  | 0.03 | 0.213   |
| Gal( $\beta$ )Cer(d18:1/22:0)      | 28.0  | 36.0  | 2.73 | 0.022   |
| Gal( $\beta$ )Cer(d18:1/23:0)      | 26.4  | 38.5  | 3.12 | 0.005   |
| Gal( $\beta$ )Cer(d18:1/24:0)      | 13.6  | 17.8  | 1.49 | 0.013   |
| Gal( $\beta$ )Cer(d18:1/24:1(15Z)) | 1.44  | 1.66  | 0.14 | 0.321   |
| Gal( $\beta$ )Cer(d18:1/25:0)      | 0.24  | 0.40  | 0.06 | 0.095   |
| Lac( $\beta$ )Cer(d18:1/14:0)      | 0.81  | 1.24  | 0.14 | 0.020   |
| Lac( $\beta$ )Cer(d18:1/16:0)      | 4.69  | 8.66  | 1.20 | 0.033   |
| Lac( $\beta$ )Cer(d18:1/17:0)      | 0.60  | 0.96  | 0.13 | 0.027   |
| Lac( $\beta$ )Cer(d18:1/18:0)      | 1.27  | 1.41  | 0.15 | 0.190   |
| Lac( $\beta$ )Cer(d18:1/18:1)      | 1.61  | 2.14  | 0.19 | 0.005   |
| Lac( $\beta$ )Cer(d18:1/19:0)      | 0.09  | 0.11  | 0.01 | -       |
| Lac( $\beta$ )Cer(d18:1/20:0)      | 1.93  | 2.28  | 0.14 | 0.114   |
| Lac( $\beta$ )Cer(d18:1/21:0)      | 0.76  | 0.97  | 0.08 | 0.043   |
| Lac( $\beta$ )Cer(d18:1/22:0)      | 10.2  | 19.1  | 2.31 | 0.016   |
| Lac( $\beta$ )Cer(d18:1/23:0)      | 7.02  | 16.05 | 1.74 | 0.002   |
| Lac( $\beta$ )Cer(d18:1/24:0)      | 6.06  | 9.79  | 0.84 | 0.001   |
| Lac( $\beta$ )Cer(d18:1/24:1)      | 0.94  | 1.56  | 0.12 | <0.0001 |
| Lac( $\beta$ )Cer(d18:1/25:0)      | 0.24  | 0.36  | 0.04 | 0.015   |
| Lac( $\beta$ )Cer(d18:1/26:0)      | 0.07  | 0.11  | 0.02 | 0.116   |

---

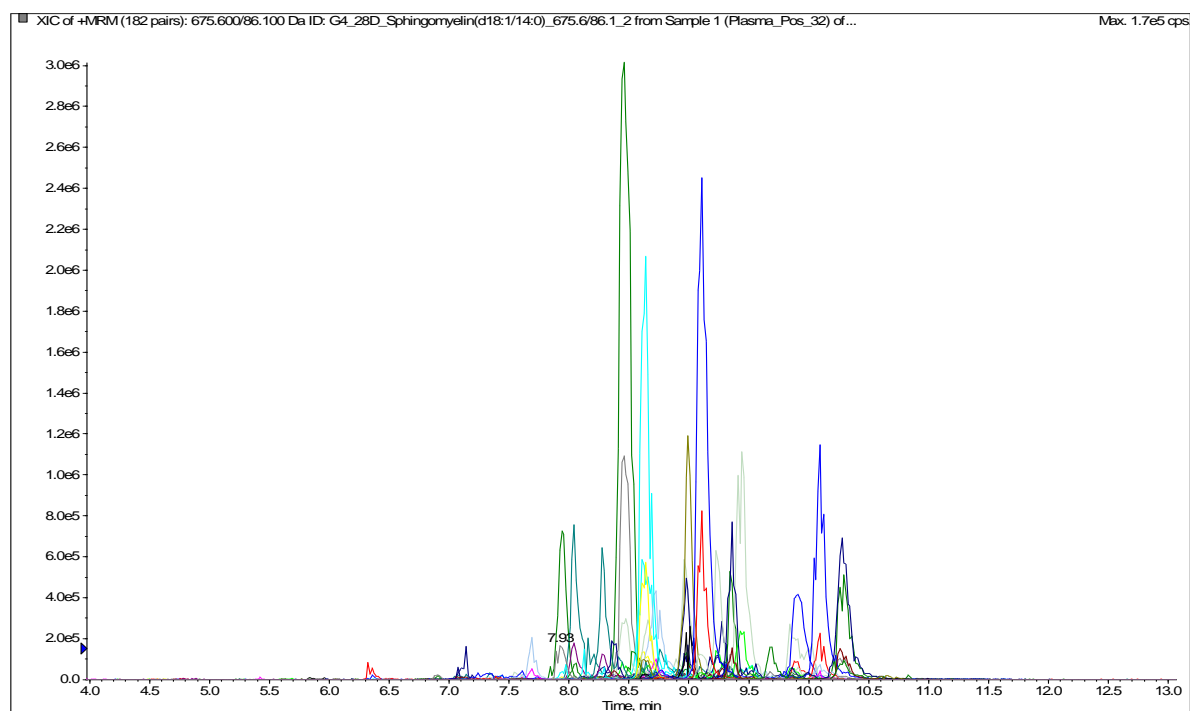

**Figure S1.** Representative extracted ion chromatogram (XIC) with ion transitions for plasma sphingolipids using UPLC-MRM/MS. Samples analyzed correspond to plasma of cows following 3 weeks of high-starch (HS) feeding or Control. Lipidomics data were obtained using UPLC-MRM/MS with a UHPLC system and QTRAP mass spectrometry operated in positive-ion mode.

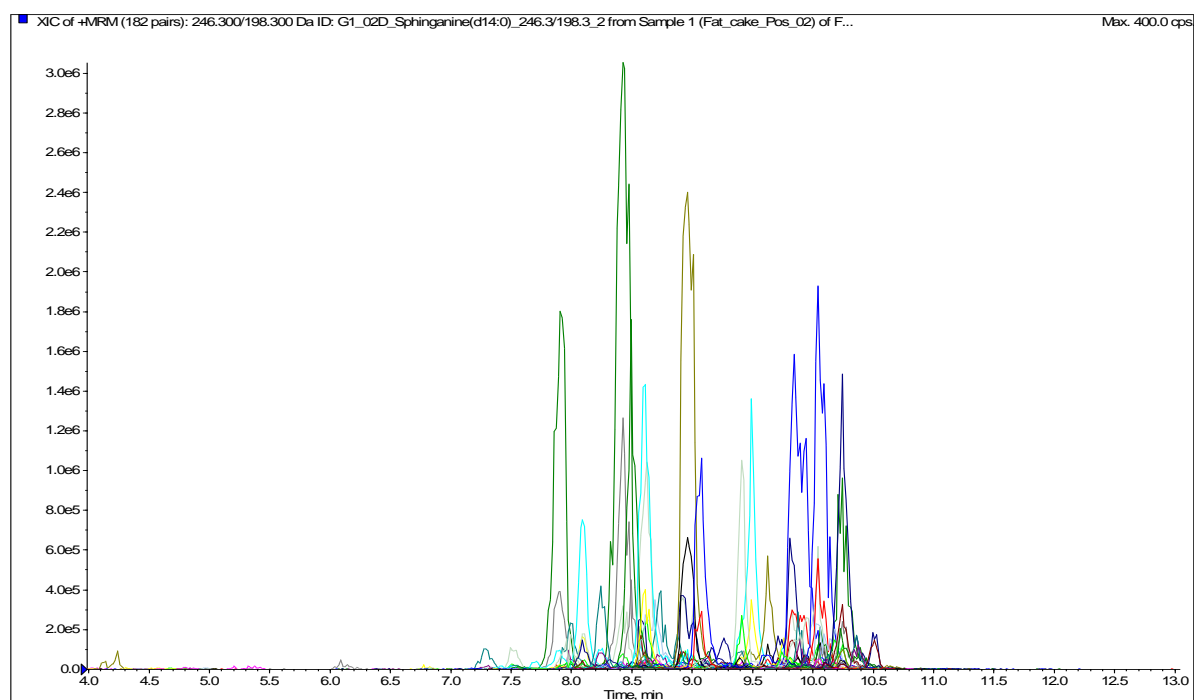

**Figure S2.** Representative extracted ion chromatogram (XIC) with ion transitions for milk fat cake sphingolipids using UPLC-MRM/MS. Samples analyzed correspond to milk of cows following 3 weeks of high-starch (HS) feeding or Control. Lipidomics data were obtained using UPLC-MRM/MS with a UHPLC system and QTRAP mass spectrometry operated in positive-ion mode.
